# Supplementary material for: HOXB8 enhances the proliferation and metastasis of colorectal cancer cells by promoting EMT via STAT3 activation
Source: Springer Nature journal article supplement (doi:10.1186/s12935-018-0717-6), 2019-01-02

without S3I-201

with S3I201

Migration

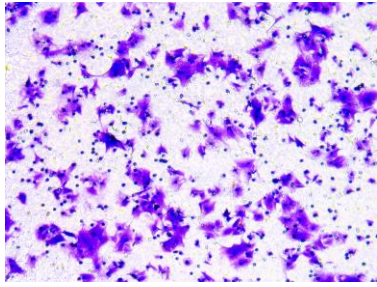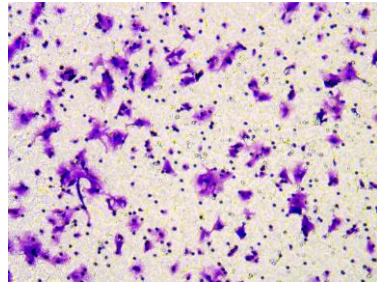

Invasion

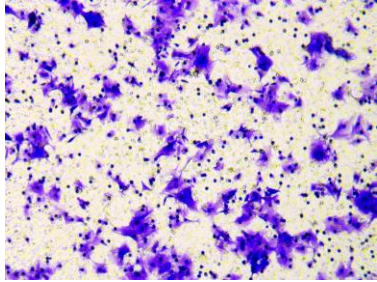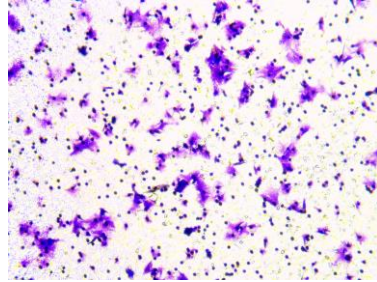

Supplement: MOESM2 [file 16373698]
